# Supplementary material
Source: PubMed Central journal article supplement (PMC1691202)
Supplement: 12590768s01.pdf [file 12590768s01.pdf]

This is an electronic appendix to the paper by R. Geeta 2003 The origin and maintenance of nuclear endosperms: viewing development through a phylogenetic lens. *Proc. R. Soc. Lond. B* 270, 29—35. (DOI 10.1098/rspb.2002.2206.)

Electronic appendices are refereed with the text. However, no attempt is made to impose a uniform editorial style on the electronic appendices.

| Family            | Genus          | State | Ref               |
|-------------------|----------------|-------|-------------------|
| Flacourtiaceae    | Abatia.Sol,    | ?     | Jas523            |
| Caprifoliaceae    | Abelia,        | 0     | JAS781            |
| Aceraceae         | Acer Rubra,    | 0     | jas 467           |
| Achariaceae       | Acharia        | ?     | jas 530           |
| Acoraceae         | Acorus Sol,    | 0     | FF2000            |
| Actinidiaceae     | Actinidiasol,  | 0*    | jas 329           |
| Bromeliaceae      | Aechmeah,      | 2     | jas 901           |
| Hippocastaneaceae | Aesculus,      | 1     | jas468            |
| Aextoxicaceae     | Aextoxicon,    | ?     | jas472            |
| Huaceae           | Afrostryax,    | ?     | JAS ?             |
| Agavaceae         | Agave,         |       | jas874            |
| Simaroubaceae     | Ailanthus,     | 1     | jas441            |
| Akaniaceae        | Akania,        | ?     | Jas447            |
| Lardizabalaceae   | Akebiadn,      | 0     | jas292;<br>FF2000 |
| Alangiaceae       | Alangium,      | 0/1   | Jas602 alb:1      |
| Fabaceae          | Albizzia,      | 1     | jas387            |
| Alliaceae         | Allium3 H,     | 1     | dcy194            |
| Betulaceae        | Alnus,         | 1     | jas124            |
| Alseuosmiaceae    | Alseuosmia,    | ?     | ?                 |
| Altingiaceae      | Altingia,      | 1     | Ac175             |
| Amborellaceae     | Amborella,     | 0     | ff2000            |
| Primulaceae       | Anagallis,     | 1     | jas633            |
| Ancistrocladaceae | Ancistrocl,    | 0     | jas 341           |
| Primulaceae       | Androsace,     | 1     | jas634            |
| Euphorbiaceae     | Androstachys,  | 1     | jas428-9          |
| Dipterocarpaceae  | Anisoptera,    | 1     | jas334            |
| Annonaceae        | Annona Z,      | 0     | jas246            |
| Scrophulariaceae  | Antirrhinum,   | 0     | jas717            |
| Flacourtiaceae    | Aphloia,       | ?     | Jas523            |
| Apiaceae          | Apium,         | 1     | jas607            |
| Apocynaceae       | Apocynum,      | 1     | jas659            |
| Aponogetonaceae   | Aponogetonh,   | 2     | jas844            |
| Thymelaeaceae     | Aquilaria.Sol, | 1     | jas517            |
| Ericaceae         | Arbutus,       | 0/1   | jas620            |
| Ericaceae         | Arctostaph2J,  | 0/1   | jas620            |
| Myrsinaceae       | Ardisiak,      | 1     | jas630            |
| Iridaceae         | Aristea Chase, | 1     | jas885            |
| Aristolochiaceae  | Aristolochia,  | 0     | jas316            |
| Aristolochiaceae  | Asarum,        | 0     | jas316            |
| Annonaceae        | Asimina Z,     | 0     | jas246            |
| Asparagaceae      | Asparagush,    | 1     | dcy140            |
| Theaceae          | Asteropeia,    | 1     | jas336            |
| Cornaceae         | Aucuba2,       | 0     | jas604            |
| Austrobaileyaceae | Austrobai Dn,  | ?     | jas255            |
| Oxalidaceae       | Averrhoa,      | 1     | jas418            |
| Balanopaceae      | Balanops,      | ?     | jas120            |
| Velloziaceae      | Barbacenia,    | 2     | dcy326            |
| Barbeyaceae       | Barbeya,       | ?     | ac189             |

|                    |                |     |                         |
|--------------------|----------------|-----|-------------------------|
| Barclayaceae       | Barclaya Dl,   | 0   | ac112; jas295           |
| Acanthaceae        | Barleria,      | 0   | Jas739                  |
| Asteraceae         | Barnadesia,    | 0/1 | jas809                  |
| Bataceae           | Batis,         | ?   | ac456                   |
| Cunoniaceae        | Bauera,        | 1   | JAS373                  |
| Fabaceae           | Bauhinia,      | 1   | jas387                  |
| Begoniaceae        | Begonia2,      |     | jas546                  |
| Luzuriagaceae      | Behnia.Sol,    | ?   | dcy135                  |
| Winteraceae        | BELLIOLIUM Z,  | 0   | jas242                  |
| Flacourtiaceae     | Berberidopsis, | ?   | Jas523                  |
| Melianthaceae      | Bersama,       | 1   | jas470                  |
| Brunoniaceae       | Berzelia,      | 1   | Delange1993             |
| Betulaceae         | Betula Papy,   | 1   | jas125-6                |
| Bixaceae           | Bixa,          | 1   | jas531                  |
| Blandfordiaceae    | Blandfordia,   | 2   | dcy156                  |
| Urticaceae         | Boehmeria,     | 1   | jas146                  |
| Alstroemeriaceae   | Bomarea,       | 1   | DeJeu &<br>Caldere 1997 |
| Bombacaceae        | Bombax,        | 1   | jas509                  |
| Calyceraceae       | Boopis,        | 0   | jas809                  |
| Boraginaceae       | Borago,        | 1   | jas690                  |
| Anthericaceae      | Borya,         | 2   | dcy186                  |
| Nyctaginaceae      | Bougainvillia, | 1   | jas213                  |
| Hyacinthaceae      | Bowiea2HAHN,   | 2   | dcy190                  |
| Cabombaceae        | Brasenia Yq,   | 2   | FF2000                  |
| Brassicaceae       | Brassica,      | 1   | jas360                  |
| Bretschneideraceae | Bretschneid,   | ?   | jas467                  |
| Grossulariaceae    | Brexia,        | 1   | jas373                  |
| Rhizophoraceae     | Bruguiera,     | 1   | jas575 ac657            |
| Loganiaceae        | Buddlejaj,     | 0   | jas653,<br>Jensen 1992  |
| Asphodelaceae      | Bulbine,       | 2   | dcy178                  |
| Burmanniaceae      | Burmannia,     | 2   | ac1237                  |
| Burseraceae        | Bursera,       | ?   | jas444                  |
| Buxaceae           | Buxsemp,       | 1   | jas488                  |
| Byblidaceae        | Byblis,        | 0   | jas399                  |
| Cabombaceae        | Cabomba Yq,    | 2   | FF2000                  |
| Loasaceae          | Caiophora,     | 0   | jas542                  |
| Arecaceae          | Calamus,       | 1   | ac1085                  |
| Marantaceae        | Calathea Loes, | 1   | dcy1188                 |
| Calectasiaceae     | Calectasiah,   | ?   | dcy155                  |
| Verbenaceae        | Callicarpa,    | 0   | jas697                  |
| Callitrichaceae    | Callitriche,   | 0   | jas702                  |
| Calycanthaceae     | Calycanth Dn,  | 0   | jas263                  |
| Theaceae           | Camellia,      | 1   | jas336                  |
| Campanulaceae      | Campanula,     | 0   | ac985                   |
| Bignoniaceae       | Campsis,       | 0   | jas733                  |
| Nyssaceae          | Camptotheca,   | 1?? | AC                      |
| Canellaceae        | CANELLA Z,     | ?   | jas252                  |
| Cannaceae          | Cannacoccb CH, | 1   | ac1185                  |
| Capparidaceae      | Capparis,      | 1   | jas358                  |
| Rhizophoraceae     | Carallia,      | 1   | jas575 ac657            |
| Caricaceae         | Carica,        | 1   | ac417                   |
| Hydrangeaceae      | Carpenteria,   | 0/1 | ac557 a<br>albach 0     |
| Juglandaceae       | Carya,         | 1   | ac212                   |
| Caryocaraceae      | Caryocar,      | ?   | jas337                  |
| Arecaceae          | Caryotah,      | 1   | ac1085                  |
| Flacourtiaceae     | Casearia,      | ?   | Jas523                  |
| Casuarinaceae      | Casuarina,     | 1   | jas114; ac230           |

|                   |                 |     |                   |
|-------------------|-----------------|-----|-------------------|
| Bignoniaceae      | Catalpa,        | 0   | jas733            |
| Berberidaceae     | Caulophyll H,   | 1   | ac130             |
| Rhamnaceae        | Ceanothus,      | 1   | jas496 ac746      |
| Amaranthaceae     | Celosia,        | 1   | jas225            |
| Ulmaceae          | Celtis,         | 1   | jas131            |
| Rubiaceae         | Cephalanthus,   | 0/1 | jas668            |
| Ceratophyllaceae  | Ceratophyllum,  | 0   | jas307            |
| Cercidiphyllaceae | Cercidiphyll,   | 0   | jas271            |
| Arecaceae         | Chamaedorea,    | 1   | ac1085            |
| Melanthiaceae     | Chamaelirium,   | 2   | dcy208            |
| Chloranthaceae    | CHLORANTHUS Z,  | 0   | ac83              |
| Anthericaceae     | Chlorophytum2,  | 2   | dcy186            |
| Chrysobalanaceae  | Chrysobalanus,  | 1   | jas382,ac582      |
| Fagaceae          | Chrysolepis,    | 1   | jas127            |
| Canellaceae       | Cinnamodendron, | ?   | jas252            |
| Lauraceae         | Cinnamomum Cz,  | 1   | JAS265            |
| Circaeasteraceae  | Circaeaster H,  | 0   | ac127             |
| Rutaceae          | Citrus,         | 1   | jas439            |
| Onagraceae        | Clarkia Sol,    | 1   | ac647, jas583     |
| Theophrastaceae   | Clavija,        | 1   | ac514             |
| Capparidaceae     | Cleome,         | 1   | jas358            |
| Verbenaceae       | Clerodendron,   | 0   | jas697            |
| Clethraceae       | Clethra,        | 0   | jas618,ac470      |
| Uvulariaceae      | Clintonia,      | 1   | dcy230            |
| Amaryllidaceae    | Clivia,         | 1/2 | dcy200            |
| Cneoraceae        | Cneorum.Sol,    | 1   | ac812             |
| Polemoniaceae     | Cobaeaj,        | 1   | ac905             |
| Cocoloba          | Cocoloba,       | 1   | jas2080           |
| Campanulaceae     | Codonopsis,     | 0   | ac985             |
| Colchicaceae      | Colchicum,      | ?   | dcy226            |
| Convallariaceae   | Convallaria,    | 1   | dcy137            |
| Convolvulaceae    | Convolvulus,    | 1   | ac898             |
| Ranunculaceae     | Coptis H,       | 1   | ac126             |
| Coriariaceae      | Coriaria,       | 1   | ac138             |
| Cornaceae         | Cornus Offso,   | 0   | jas604            |
| Cornaceae         | Corokia,        |     | jas604            |
| Hamamelidaceae    | Corylopsis H,   | 0/1 | jas368            |
| Corynocarpaceae   | Corynocarpus,   | 1   | ac724             |
| Costaceae         | Costus Barbh,   | 2   | Ac1183            |
| Lecythidaceae     | Couropita,      | 1   | jas573            |
| Crassulaceae      | Crassula,       | 0   | jas371            |
| Elaeocarpaceae    | Crinodendron,   | 1   | jas502            |
| Crossosomataceae  | Crossosoma,     | 1   | jas329            |
| Cucurbitaceae     | Cucumis,        | 1   | ac424             |
| Cucurbitaceae     | Cucurbita,      | 1   | ac424             |
| Sapindaceae       | Cupaniopsis,    | 1   | jas467            |
| Tecophilaeaceae   | Cyanella,       | 1   | dcy164            |
| Cyclanthaceae     | Cyclanthush,    | 2   | jas951            |
| Cyperaceae        | Cyperush,       | 1   | jas976            |
| Orchidaceae       | Cypripediumh,   | 1   | jas999            |
| Cyrillaceae       | Cyrillak,       | 0   | jas480            |
| Gesneriaceae      | Cyrtandra,      | 0   | jas748            |
| Daphniphyllaceae  | Daphniphyllum,  | 0   | Ac179             |
| Dasyopogonaceae   | Dasyopogon,     | ?   | dcy151            |
| Datisceae         | Datiscas,       | 1   | ac427             |
| Davidsoniaceae    | Davidsonia,     | ?   | jas366            |
| Lardizabalaceae   | Decaisnea_H,    | 0   | jas292;<br>FF2000 |
| Hydrangeaceae     | Decumaria,      | 0/1 | ac557<br>albach 0 |
| Degeneriaceae     | Degeneria,      | 0   | jas238            |

|                     |                |     |                        |
|---------------------|----------------|-----|------------------------|
| Araliaceae          | Delarbrea,     | 1   | ac845                  |
| Aizoaceae           | Delosperma,    | 1   | Jas216                 |
| Loranthaceae        | DENDROPH C,    | 0   | jas180                 |
| Dialypetalanthaceae | Dialypetalan,  | ?   | jas571                 |
| Malpighiaceae       | Dicella,       |     |                        |
| Fumariaceae         | Dicentra H,    | 1   | ac149                  |
| Dichapetalaceae     | Dichapetalum,  | 1   | jas517                 |
| Didymelaceae        | Didymeles,     | ?   | jas121                 |
| Scrophulariaceae    | Digitalis,     | 0   | jas717                 |
| Dilleniaceae        | Dillenia N,    | 1   | ac298                  |
| Zingiberaceae       | Dimerocostush, | 2   | ac1180 dcy362          |
| Dioscoreaceae       | Dioscorea Sol, | 1   | ac1230                 |
| Ebenaceae           | Diospyrosj,    | 0   | jas643                 |
| Dipsacaceae         | Dipsacus,      | 0   | ac1015                 |
| Hamamelidaceae      | Disanthus H,   | 0/1 | jas368                 |
| Donatiaceae         | Donatia,       | ?   | jas828                 |
| Winteraceae         | Drimys Arsol,  | 0   | jas242                 |
| Droseraceae         | Drosera,       | 1   | ac375                  |
| Euphorbiaceae       | Drypetes,      | 1   | jas428                 |
| Duckeodenraceae     | Duckeoden,     | ?   | jas715                 |
| Crassulaceae        | Dudleya,       | 0   | jas371                 |
| Bombacaceae         | Durio,         | 1   | jas509                 |
| Elaeagnaceae        | Elaeagnus,     | 1   | ac607                  |
| Elaeocarpaceae      | Elaeocarpus,   | 1   | jas502                 |
| Musaceae            | Ensete Venth,  | 1   | ac1176                 |
| Onagraceae          | Epilobium,     | 1   | ac647, jas583          |
| Phytolaccaceae      | Ercilla,       | 1   | ac249                  |
| Eremosynaceae       | Eremosyne,     | ?   | Jas                    |
| Erythroxyllaceae    | Erythroxyllon, | 1   | ac756                  |
| Grossulariaceae     | Escallonia,    | 0   | Alb                    |
| Eremolepidaceae     | Eubrachion,    | ?   | Jas                    |
| Loasaceae           | Eucnide,       | 0   | jas542                 |
| Eucommiaceae        | Eucommia H,    | 0   | ac184; jas132          |
| Eucryphiaceae       | Eucryphia2,    | ?   | jas29                  |
| Celastraceae        | Euonymus,      | 1   | ac714                  |
| Euphorbiaceae       | Euphorbia Pul, | 1   | jas428                 |
| Eupomatiaceae       | Eupomatia,     | ?   | jas248                 |
| Eupteleaceae        | Euptelea H,    | 0   | jas270                 |
| Theaceae            | Eurya,         | 1   | jas336                 |
| Verbenaceae         | Euthystachys,  | 0   | jas697                 |
| Gentianaceae        | Exacum,        | 1   | ac873                  |
| Hamamelidaceae      | Exbuckl H,     | 1   | jas368                 |
| Fagaceae            | Fagus,         | 1   | jas127                 |
| Hydrangeaceae       | Fendlera,      | 1   | jas373                 |
| Moraceae            | Ficus,         | 1   | jas132                 |
| Flacourtiaceae      | Flacourtia J,  | 1   | Jas523                 |
| Flagellariaceae     | Flagellaria,   | ?   |                        |
| Limnanthaceae       | Floerkea,      | 1   | jas317                 |
| Saxifragaceae       | Francoa,       | 1   | jas373                 |
| Frankeniaceae       | Frankenia,     | 1   | ac407                  |
| Pandanaceae         | Freycinetia,   | 1   | ac1091                 |
| Diapensiaceae       | Galax,         | 0   | jas616                 |
| Himantandraceae     | GALBULIMIMA Z, | ?   | jas242                 |
| Malpighiaceae       | Galphimia,     |     |                        |
| Garryaceae          | Garrya,        | 1   | ac672; jas606          |
| Loganiaceae         | Gelsemium,     | 0   | jas653,<br>Jensen 1992 |
| Geraniaceae         | Geranium,      | 1   | ac830                  |
| Asteraceae          | Gerbera,       | 0   | jas809                 |
| Polemoniaceae       | Gilia,         | 1   | ac905                  |
| Iridaceae           | Gladiolus Cha, | 1   | jas885                 |

|                   |                 |     |                   |
|-------------------|-----------------|-----|-------------------|
| Paeoniaceae       | Glaucidium H,   | 1   | ac301             |
| Zingiberaceae     | Globba Curth,   | 2   | ac1180 dcy362     |
| Bromeliaceae      | Glomeropit2H,   | 2   | jas 901           |
| Gomortegaceae     | GOMORTEGA Z,    | ?   | jas265            |
| Icacinaceae       | Gonocaryum,     | 1   | Ac722 jas490      |
| Malvaceae         | Gossypium,      | 1   | ac358             |
| Celastraceae      | Goupia,         | 1   | ac714             |
| Tiliaceae         | Grewia.Sol,     | 1   | ac352             |
| Greyiaceae        | Greyia,         | ?   | JAS-no info       |
| Cornaceae         | Griselinia,     | ?   | jas604            |
| Zygophyllaceae    | Guaiacum,       | 1   | ac817             |
| Gunneraceae       | Gunnera,        | 0   | ac619             |
| Lecythidaceae     | Gustavia,       | 1   | jas573            |
| Araceae           | Gymnostachysh,  | 0   | dcy277            |
| Hernandiaceae     | GYROCARPUS Z,   | 0   | ac79              |
| Styracaceae       | Halesiaj,       | 0   | ac503             |
| Haloragidaceae    | Haloragis,      | 0   | jas586            |
| Hamamelidaceae    | Hamamelis2 H,   | 1   | jas368            |
| Araliaceae        | HederaSol,      | 1   | ac845             |
| Monimiaceae       | Hedycaryaz,     | 0   | ac68; jas261      |
| Zingiberaceae     | Hedychium Flh,  | 2   | ac1180 dcy362     |
| Chloranthaceae    | Hedyosmum,      | 0   | ac83              |
| Cistaceae         | Helianthemum,   | 1   | ac396             |
| Asteraceae        | Helianthus,     | 0   | Marciniak         |
| Heliconiaceae     | Helicon Indi2,  | 1   | ac1173            |
| Philydraceae      | Helmholtzia2,   | 2   | dcy334            |
| Cornaceae         | Helwingia,      | ?   | jas604            |
| Myrtaceae         | Heteropyxis,    | 1   | ac642             |
| Saxifragaceae     | Heuchera,       | 1   | jas373            |
| Amaryllidaceae    | Hippeastrum2H,  | 1/2 | dcy200            |
| Celastraceae      | Hippocratea,    | 1   | ac714             |
| Saururaceae       | Houttuyni,      | 0/2 | ac85              |
| Humiriaceae       | Humiria,        | 1   | ac757             |
| Cannabidaceae     | Humulus,        | 1   | jas148            |
| Flacourtiaceae    | Hydnocarpus     | 1   | Jas523            |
| Hydrangeaceae     | Hydrangea       | 0/1 | ac557<br>albach 0 |
| Ranunculaceae     | Hydrastis H,    | 1   | ac126             |
| Hydrophyllaceae   | Hydrolea,       | 0   | jas686            |
| Hydrophyllaceae   | Hydrophyllum,   | 0   | jas686            |
| Hydrostachydaceae | Hydrostachys,   | 0   | jas407            |
| Violaceae         | Hymenanchera,   | 1   | ac404             |
| Fumariaceae       | Hypocoum H,     | 1   | ac149             |
| Guttiferae        | Hypericum,      | 1   | ac334             |
| Icacinaceae       | Icacina.Sol,    | 1   | Ac722 jas490      |
| Flacourtiaceae    | Idesia,         | ?   | Jas523            |
| Idiospermaceae    | Idiospermum,    | ?   | ac74              |
| Fouquieriaceae    | Idria,          | 0   | ac420? Ac         |
| Aquifoliaceae     | Ilexopaca,      | 0   | ac720             |
| Illiciaceae       | Illicium2 H,    | 0   | FF2001            |
| Balsaminaceae     | Impatiensj,     | 0   | ac833             |
| Convolvulaceae    | Ipomoea Dn,     | 1   | ac898             |
| Arecaceae         | Iriarteah,      | 1   | ac1085            |
| Icacinaceae       | Irvingbaile,    | 1   | Ac722 jas490      |
| Simaroubaceae     | Irvingia,       | 1   | jas441            |
| Grossulariaceae   | Itea,           | ?   | jas373 Alb        |
| Grossulariaceae   | Ixerba,         | ?   | jas373 Alb        |
| Ixioliriaceae     | Ixiolirion,     | 2   | dcy170            |
| Ixonanthaceae     | Ixonanthes.Sol, | 1   | ac759             |
| Melanthiaceae     | Japonolirion,   | 2   | dcy208            |
| Oleaceae          | Jasminum,       | 0   | ac950             |

|                  |                |     |               |
|------------------|----------------|-----|---------------|
| Juglandaceae     | Juglans,       | 1   | ac212         |
| Juncaceae        | Juncus,        | 2   | ac1131        |
| Acanthaceae      | Justicia,      | 0   | Jas739        |
| Crassulaceae     | Kalenchoe,     | 0   | jas371        |
| Rosaceae         | Kerria,        | 1   | jas380 ac576  |
| Flacourtiaceae   | Kigellaria,    | ?   | Jas523        |
| Circaeasteraceae | Kingdonia H,   | 0   | ac127         |
| Myristicaceae    | KNEMA Z,       | 1   | ac56          |
| Capparidaceae    | Koeberlinia,   | 1   | jas358        |
| Sapindaceae      | Koelreute Dn,  | 1   | jas467        |
| Krameriaceae     | Krameria,      | ?   | ac779         |
| Lacistemataceae  | Lacistema,     | 1   | ac398         |
| Lactoridaceae    | Lactoris,      | 1   | ac52          |
| Lamiaceae        | Laniumj,       | 0   | jas708        |
| Verbenaceae      | Lantana,       | 0   | jas697        |
| Monimiaceae      | Laurelia,      | 0   | ac68; jas261  |
| Leeaceae         | Leea,          | 1   | ???           |
| Saxifragaceae    | Lepuropet,     | 1   | jas373        |
| Chrysobalanaceae | Licania2,      | 1   | jas382, ac582 |
| Liliaceae        | Lilium Sup So, | 1   | dcy222        |
| Limnanthaceae    | Limnanthes,    | 1   | jas317        |
| Plumbaginaceae   | Limonium.Sol,  | 1   | ac284         |
| Linaceae         | Linum,         | 1   | ac762         |
| Hamamelidaceae   | Liquidambar,   | 0/1 | jas368        |
| Magnoliaceae     | Liriodendron,  | 0   | ac51          |
| Convallariaceae  | Liriopeh,      | 1   | dcy137        |
| Campanulaceae    | Lobelia,       | 0   | ac985         |
| Luzuriagaceae    | LuzuriagalH,   | ?   | dcy135        |
| Solanaceae       | Lycopersicon,  | 0   | jas713        |
| Lythraceae       | Lythrum,       | 1   | ac631         |
| Myrsinaceae      | Maesa,         | 1   | jas630        |
| Magnoliaceae     | Magnolia Acc,  |     | ac51          |
| Malesherbiaceae  | Malesherbia,   | ?   | ac412         |
| Malphiaceae      | Malphigia,     | 1   | ac770         |
| Manglietiaceae   | Manglietia Z,  | ?   | ?             |
| Sapotaceae       | Manilkaraj,    | 1   | ac498         |
| Marantaceae      | Maranta2 H,    | 1   | dcy1188       |
| Podostemaceae    | Marathrum,     | ?   | ac613         |
| Marcgraviaceae   | Marcgravia,    | 0   | ac332         |
| Medusagynaceae   | Medusagyne,    | ?   | No info       |
| Cornaceae        | Melanophylla,  | ?   | jas604        |
| Sabiaceae        | Meliosma,      | 2   | ac140         |
| Menispermaceae   | Menispermum H, | 0   | ac133         |
| Menyanthaceae    | Menyanthes,    | 0   | ac902         |
| Guttiferae       | Mesua,         | 1   | ac339         |
| Arecaceae        | Metroxylonh,   | 1   | ac1085        |
| Asteliaceae      | Milligania,    | ?   | dcy148        |
| Nyctaginaceae    | Mirabilis,     | 1   | jas213        |
| Rubiaceae        | Mitchella,     | 0/1 | jas668        |
| Molluginaceae    | Mollugo,       | 1   | ac272         |
| Costaceae        | Monocostush,   | 2   | Ac1183        |
| Geraniaceae      | Monsonia,      | 1   | ac830         |
| Grossulariaceae  | Montinia,      | ?   | jas373 Alb    |
| Moringaceae      | Moringa,       | 1   | ac450         |
| Moraceae         | Morus,         | 1   | jas132        |
| Melastomaceae    | Mouriri,       | 1   | ac651         |
| Alliaceae        | Muilla,        | 1   | dcy194        |
| Flacourtiaceae   | Muntingia,     | ?   | Jas523        |
| Musaceae         | Musa2 H,       | 1   | ac1176        |
| Musaceae         | Musellah,      | 1   | ac1176        |
| Myoporaceae      | Myoporum,      | 0   | ac957         |

|                  |                |        |                   |
|------------------|----------------|--------|-------------------|
| Myricaceae       | Myrica,        | 1      | ac216             |
| Haloragidaceae   | Myriophyllum,  | 0/1    | jas586            |
| Myristicaceae    | Myristicaz,    | 1      | ac56              |
| Myrothamnaceae   | Myrothamnus H, | 1      | ac176             |
| Berberidaceae    | Nandina H,     | 1      | ac130             |
| Lecythidaceae    | Napoleoneakm,  | 1      | jas573            |
| Nelumbonaceae    | Nelumbo Hm,    | 1      | ac109             |
| Nepenthaceae     | Nepenthes,     | 1      | jas350            |
| Apocynaceae      | Nerium,        | 1      | jas659            |
| Neuradaceae      | Neurada,       | ?      | ac577             |
| Solanaceae       | Nicotiana,     | 0      | jas713            |
| Nolanaceae       | Nolana,        | 0      | ac892             |
| Nolinaceae       | Nolina,        | 1      | dcy146            |
| Nymphaeaceae     | Nuphar_Japc,   | 0      | ac111: FF<br>2001 |
| Nymphaeaceae     | NYMPHAEA Spz,  | 0/1/2/ | FF2001            |
| Menyanthaceae    | Nymphoides,    | 0      | ac902             |
| Nyssaceae        | Nyssasol,      | 1??    | AC                |
| Ochnaceae        | Ochna,         | 1      | ac313             |
| Bombacaceae      | Ochroma.Sol,   | 1      | jas509            |
| Oleaceae         | Oleaj,         | 0      | ac950             |
| Orchidaceae      | Oncidiumsol,   | 1      | jas999            |
| Oncothecaceae    | Oncotheca,     | ?      | ac331             |
| Opiliaceae       | Opiliasol,     | 0      | ac685             |
| Lowiaceae        | Orchidantha,   | ?      |                   |
| Poaceae          | Oryza,         | 1      | ac1145            |
| Melastomaceae    | Osbeckia,      | 1      | ac651             |
| Santalaceae      | Osyrisol,      | 2      | ac687             |
| Oxalidaceae      | Oxalis,        | 1      | jas418            |
| Buxaceae         | Pachproc H,    | 1      | jas488            |
| Paeoniaceae      | Paeonia,       | 1      | ac301             |
| Araliaceae       | Panax,         | 1      | ac845             |
| Flacourtiaceae   | Pangium,       | ?      | Jas523            |
| Saxifragaceae    | Parnassia,     | 1      | jas373            |
| Passifloraceae   | Paropsia,      | 1      | ac414             |
| Passifloraceae   | Passiflora,    | 1      | ac414             |
| Scrophulariaceae | Paulownia,     | 0      | jas717            |
| Scrophulariaceae | Pedicular Dn,  | 0      | jas717            |
| Geraniaceae      | Pelargonium,   | 1      | ac830             |
| Pelliceraceae    | Pellicera,     | ?      | ac330             |
| Saxifragaceae    | Peltboyt,      | 0/1/2  | jas373            |
| Rubiaceae        | Pentas,        | 0/1    | jas668            |
| Saxifragaceae    | Penthorum,     | 0      | jas373            |
| Piperaceae       | Peperomia Oz,  | 0      | ac88              |
| Cactaceae        | Pereskia,      | 1      | ac260             |
| Loasaceae        | Petalonyx,     | 0      | jas542            |
| Petrosaviaceae   | Petrosavia,    | ?      | dcy209            |
| Solanaceae       | Petunia,       | 0      | jas713            |
| Monimiaceae      | Peumus,        | 0      | ac68; jas261      |
| Aquifoliaceae    | Phelline,      | 0      | ac720             |
| Strelitziaceae   | Phenakospermh, | 1      | ac1172            |
| Hydrangeaceae    | Philadelphus,  | 0/1    | ac557 albach<br>0 |
| Philydraceae     | Philydrella,   | 2      | dcy334            |
| Polemoniaceae    | Phlox,         | 1      | ac905             |
| Arecaceae        | Phoenix,       | 1      | ac1085            |
| Rosaceae         | Photinia,      | 1      | jas380 ac576      |
| Verbenaceae      | Phyla,         | 0      | jas697            |
| Grossulariaceae  | Phyllonoma,    | ?      | jas373 Alb        |
| Phytolaccaceae   | Phytolacca,    | 1      | ac249             |
| Urticaceae       | Pilea,         | 1      | jas146            |

|                  |                |     |               |
|------------------|----------------|-----|---------------|
| Lentibulariaceae | Pinguicula,    | 0   | ac975         |
| Piperaceae       | PIPER Z,       | 1   | ac88          |
| Fabaceae         | Pisum Sativum, | 1   | jas387        |
| Pittosporaceae   | Pittospor,     | 1   | ac552         |
| Proteaceae       | Placospermum,  | 1   | ac610; JAS151 |
| Flacourtiaceae   | Plagiopteron,  | ?   | Jas523        |
| Plantaginaceae   | Plantago,      | 1   | ac937         |
| Platanaceae      | Platanus,      | 1   | FF2000        |
| Tremandraceae    | Platytheca,    | ?   | jas455        |
| Melanthiaceae    | Pleea,         | 2   | dcy208        |
| Plumbaginaceae   | Plumbago,      | 1   | ac284         |
| Arecaceae        | Podococcosh,   | 1   | ac1085        |
| Polygalaceae     | Polygala,      | 1   | ac777         |
| Polygonaceae     | Polygonum Chc, | 1   | ac280         |
| Rutaceae         | Poncirus,      | 1   | jas439        |
| Pontederiaceae   | Pontederia,    | 2   | ac1202        |
| Salicaceae       | Populus,       | 1   | ac434         |
| Portulacaceae    | Portulaca,     | 1   | ac268         |
| Pedaliaceae      | Proboscidea,   | 0   | ac967         |
| Rosaceae         | Prunus,        | 1   | jas380 ac576  |
| Fumariaceae      | Pteridophyl H, | 1   | ac149         |
| Grossulariaceae  | Pterostemon,   | ?   | jas373 Alb    |
| Punicaceae       | Punicasol,     | 1   | ac645         |
| Bromeliaceae     | Puya,          | 2   | jas 901       |
| Vochysiaceae     | Qualea,        | 1   | jas454        |
| Fagaceae         | Quercus,       | 1   | jas127        |
| Quiinaceae       | Quiina,        | ?   | JAS1011       |
| Combretaceae     | Quisqualis,    | 1   | ac654         |
| Ranunculaceae    | Ranunculus,    | 1   | ac126         |
| Strelitziaceae   | Ravenala Madh, | 1   | ac1172        |
| Linaceae         | Reinwardtia,   | 1   | ac762         |
| Resedaceae       | Reseda,        | 1   | ac451         |
| Restionaceae     | Restio,        |     | ac1124 dcy457 |
| Rhabdodendraceae | Rhabdodendron, | ?   | jas: nothing  |
| Rhamnaceae       | Rhamnus,       | 1   | jas496 ac746  |
| Hypoxidaceae     | Rhodohypoxis,  | 2   | dcy162        |
| Gesneriaceae     | Rhynchogloss,  |     | jas748        |
| Cyperaceae       | Rhyncospora,   | 1   | jas976        |
| Grossulariaceae  | Ribes,         | 0/2 | jas373 Alb    |
| Zingiberaceae    | Riedelia Wray, | 2   | ac1180 dcy362 |
| Rubiaceae        | Rogiera,       | 0/1 | jas668        |
| Byblidaceae      | Roridula,      | 0   | jas 399       |
| Proteaceae       | Roupala,       | 1   | ac610; JAS151 |
| Grossulariaceae  | Roussea,       |     | jas373 Alb    |
| Ruscaceae        | Ruscush,       | ?   | dcy142        |
| Sabiaceae        | Sabia H,       | 2   | ac140         |
| Salicaceae       | Salix,         | 1   | ac434         |
| Caprifoliaceae   | Sambucus,      | 0   | JAS781        |
| Santalaceae      | Santalum,      | 2   | ac687         |
| Chloranthaceae   | SARCANDRA Z,   | 0   | ac83          |
| Sarcolaenaceae   | Sarcolaena,    | ?   | jas502        |
| Sargentodoxaceae | Sargentodox H, | ?   | jas292        |
| Sarraceniaceae   | Sarracenia,    | 0   | jas349        |
| Aristolochiaceae | Saruma,        | 0   | jas316        |
| Lauraceae        | Sassafras,     | 1   | JAS265        |
| Saururaceae      | Saururussol,   | 0/2 | ac85          |
| Saxifragaceae    | Saxintegrif,   | 0/2 | jas373        |
| Saxifragaceae    | Saxmerten,     | 0/2 | jas373        |
| Dipsacaceae      | Scabiosa,      | 0   | ac1015        |
| Goodeniaceae     | Scaevola,      | 0   | ac991         |
| Anacardiaceae    | Schinus,       | 0   | ac807         |



|                  |                |       |                        |
|------------------|----------------|-------|------------------------|
| Schisandraceae   | Schisandra H,  | 0     | ac99                   |
| Solanaceae       | Schizanthus,   | 1     | jas713                 |
| Olcaceae         | Schoepfia,     | 0/2   | jas157                 |
| Hyacinthaceae    | Scillah,       | 2     | dcy190                 |
| Trilliaceae      | Scoliopus,     | 1     | dcy124                 |
| Scrophulariaceae | Scrophularia,  | 0     | jas717                 |
| Polygalaceae     | Securidaca,    | 1     | ac777                  |
| Crassulaceae     | Sedum,         | 0     | jas371                 |
| Pedaliaceae      | Sesamum,       | 0     | ac967                  |
| Capparidaceae    | Setchellanth,  | 1     | jas358                 |
| Elaeagnaceae     | Shepherdia,    | 1     | ac607                  |
| Simmondsiaceae   | Simmondsia,    | 0     | jas489                 |
| Lardizabalaceae  | Sinofranch_H,  | 0     | jas292;<br>FF2000      |
| Celastraceae     | Siphonodon,    | 1     | ac714                  |
| Elaeocarpaceae   | Sloanea,       | 1     | jas502                 |
| Convallariaceae  | Smilacinah,    | 1     | dcy137                 |
| Smilacaeae       | Smilax,        | 1     | dcy127                 |
| Pittosporaceae   | Sollya,        | 1     | ac552                  |
| Sparganiaceae    | Sparganium N,  | 2     | dcy345                 |
| Araceae          | Spathiphyllum, | 0     | dcy277                 |
| Cyclanthaceae    | Sphaeradenia,  | 2     | jas951                 |
| Loganiaceae      | Spigelia,      | 0     | jas653,<br>Jensen 1992 |
| Amaranthaceae    | Spinacia,      | 1     | jas225                 |
| Rosaceae         | Spiraea,       | 1     | jas380 ac576           |
| Euphorbiaceae    | Stachystemon,  | 1     | jas428                 |
| Stachyuraceae    | Stachyurus,    | 1     | ac401                  |
| Stackhousiaceae  | Stackhousia,   | 1     | ac717                  |
| Staphyleaceae    | Staphylea,     | 1     | ac791                  |
| Caryophyllaceae  | Stellaria,     | 1     | ac274                  |
| Stemonaceae      | Stemona,       | 1     | dcy122                 |
| Sterculiaceae    | Sterculia,     | 1     | ac355                  |
| Strelitziaceae   | Strelitzia Nh, | 1     | ac1172                 |
| Gesneriaceae     | Streptocarpus, |       | jas748                 |
| Stylidiaceae     | Stylidium,     | 0     | ac987                  |
| Stylobasiaceae   | Stylobasium,   | 1     | ac584                  |
| Styracaceae      | Styraxj,       | 0     | ac503                  |
| Saxifragaceae    | Sullivantiaor, | 0/1/2 | jas373                 |
| Meliaceae        | Swietenia,     | 1     | ac815                  |
| Caprifoliaceae   | Symphoricar,   | 0     | JAS781                 |
| Symplocaceae     | Symplocok,     | 0     | Jas645                 |
| Taccaceae        | Tacca Sol,     | 1     | dcy120                 |
| Asteraceae       | Tagetes,       | 0/1   | jas809                 |
| Winteraceae      | Takhtajania,   | 0     | jas242                 |
| Tamaricaceae     | Tamarix,       | 1     | ac406 jas              |
| Costaceae        | Tapeinochilos, | 2     | Ac1183                 |
| Staphyleaceae    | Tapiscia,      | 1     | ac791                  |
| Winteraceae      | TASMANIA Z,    | 0     | jas242                 |
| Tecophilaeaceae  | Tecophilaea,   | 1     | dcy164                 |
| Combretaceae     | Terminaliaks,  | 1     | ac654                  |
| Theaceae         | Ternstroemia,  | 1     | jas336                 |
| Grossulariaceae  | Tetracarpaea,  |       | jas373 Alb             |
| Tetracentraceae  | Tetracentron,  | 0     | ac159                  |
| Dilleniaceae     | Tetracera,     | 1     | ac298                  |
| Datisceae        | Tetrameless,   | 1     | ac427                  |
| Tetrameristaceae | Tetramerista,  | ?     | ac329                  |
| Sterculiaceae    | Theobroma,     | 1     | ac355                  |
| Acanthaceae      | Thunbergia,    | 0     | Jas739                 |
| Thymeleaceae     | Thymelea,      | 1     | jas517                 |
| Tiliaceae        | Tilia,         | 1     | ac352                  |

|                  |                 |     |               |
|------------------|-----------------|-----|---------------|
| Menispermaceae   | Tinospora H,    | 0   | ac133         |
| Gesneriaceae     | Titanotrich,    |     | jas748        |
| Melanthiaceae    | Tofieldia.Sol,  | 2   | dcy208        |
| Commelinaceae    | Tradescantia,   | 1   | ac1115        |
| Asteraceae       | Tragopogon,     | 0/1 | jas809        |
| Ulmaceae         | Trema,          | 1   | jas131        |
| Rhamnaceae       | Trevoa,         | 1   | jas496 ac746  |
| Meliaceae        | Trichilia,      | 1   | ac815         |
| Uvulariaceae     | Tricyrtis,      | 1   | dcy230        |
| Trigoniaceae     | Trigonia,       | 1   | jas450        |
| Trilliaceae      | Trillium.Sol,   | 1   | dcy124        |
| Dioncophyllaceae | Triphyophyll,   | ?   | jas333        |
| Tetracentraceae  | Trochodendron,  | 0   | ac159         |
| Tropaeolaceae    | Tropaeolum,     | ?   | ac834         |
| Turneraceae      | Turnera,        | 1   | ac411         |
| Lentibulariaceae | Utricularia,    | 0   | ac975         |
| Saxifragaceae    | Vahlia=Bistella | 0   | jas373        |
| Valerianaceae    | Valeriana,      | 0   | ac1013        |
| Hydrocharitaceae | Vallisneriah,   | 2   | dcy305        |
| Scrophulariaceae | Verbascum,      | 0   | jas717        |
| Verbenaceae      | Verbena,        | 0   | jas697        |
| Scrophulariaceae | Veronica,       | 0   | jas717        |
| Caprifoliaceae   | Viburnum,       | 0   | JAS781        |
| Viscaceae        | Viscumsol,      | 0   | jas197        |
| Vitiaceae        | Vitis,          | 1   | ac750         |
| Geraniaceae      | Viviania,       | 1   | ac830         |
| Sapindaceae      | Xanthoceras,    | 1   | jas467        |
| Ranunculaceae    | Xanthorhiza H,  | 1   | ac126         |
| Xanthorrhoeaceae | Xanthorrhoea2,  | ?   | jas872        |
| Phormiaceae      | Xeronema.Sol,   | 2   | scy172        |
| Melanthiaceae    | Xerophyllum,    | 2   | dcy208        |
| Xyridaceae       | Xyris,          |     | DCY390        |
| Gramineae        | Zea             | 1   | DCY420        |
| Ulmaceae         | Zelkova,        | 1   | jas131        |
| Zingiberaceae    | Zingiber2 H,    | 2   | ac1180 dcy362 |
| Zosteraceae      | Zostera,        | 1   | dcy318        |

JAS 1992: Johri, B. M., Ambegaokar, K. B., & Srivastava, K. B. 1992. *Comparative Embryology of Angiosperms*, Berlin: Springer-Verlag.

DCY: Dahlgren, R. M. T., Clifford, H. T., et al. 1985. *The families of the monocotyledons*, Berlin: Springer-Verlag.

AC: Cronquist, A. 1981. *An integrated system of classification of flowering plants*, Columbia University Press.

FF2000: Floyd, S. K. & Friedman, W. E. 2000. Evolution of endosperm developmental patterns among basal flowering plants. *Int. J. Plant Sci.* **161**, S57-S81.

FF2001: Floyd, S. K. & Friedman, W. E. 2001. Developmental evolution of endosperm in basal angiosperms: evidence from *Amborella* (Amborellaceae), *Nuphar* (Nymphaeaceae), and *Illicium* (Illiciaceae). *Plant Syst. Evol.* **228**, 153-169.

Alb: Albach, D. C., Soltis, P. S., Soltis D. E. 2001. Patterns of embryological and biochemical evolution in the asterids. *Syst. Bot.* **26**, 242-262.

- DeJeu, M. & Caldere, F. G. 1997. Retarded embryo growth and early degeneration of sporophytic tissue are associated with embryo abortion in the interspecific cross *Alstroemeria pelegrina* x *Alstroemeria aurea*. *Can. J. Bot.* **75**, 916-924.
- Delange, J. H., Thompson, G. R., et al. 1993. Autecological studies on *Audouinia capitata* (Bruniaceae). 7. Nutritional aspects in the mature seed. *South African Journal of Botany* **59**, 178-187.
- Jensen, S. R. 1992. Systematic implications of the distribution of iridoids and other chemical compounds in the Loganiaceae and other families of the Asteridae. *Ann. MO Bot. Gard.* **79**, 284-302.
- Marciniak, K. 1991. DNA endoreplication level in endosperm and in cotyledons during seed development in 3 dicotyledonous species. *Acta societatis botanicorum poloniae* **60**, 273-284.
